# Supplementary material for: Applying a Method for Augmenting Data Mixed from Two Different Sources Using Deep Generative Neural Networks to Management Science
Source: MDPI journal article supplement (doi:10.3390/app14010378), 2023-12-31
Supplement: s1 [file s1]

## Supplementary Information

Table S1: The default parameters in each deep generative model.

| CTGAN               |                                                                            |              |
|---------------------|----------------------------------------------------------------------------|--------------|
| Parameters          | Explanations                                                               | Values       |
| batch_size          | Number of samples to process in each step when learning the algorithm      | 500          |
| discriminator_dim   | Size of the output samples for each one of the Discriminator Layers        | ( 256, 256 ) |
| discriminator_decay | Weight decay for the Adam Optimizer in the discriminator                   | 1e-6.        |
| discriminator_lr    | Learning rate (Discriminator)                                              | 2.00E-04     |
| discriminator_steps | Number of discriminator updates to do for each generator update            | 1            |
| embedding_dim       | Size of the random sample passed to the Generator                          | 128          |
| generator_decay     | Generator weight decay for the Adam Optimizer                              | 1.00E-06     |
| generator_dim       | Size of the output samples for each one of the Residuals                   | ( 256, 256 ) |
| generator_lr        | Learning rate (Generator)                                                  | 2.00E-04     |
| log_frequency       | Whether to use log frequency of categorical levels in conditional sampling | TRUE         |
| pac                 | Number of samples to group together when applying the discriminator        | 10           |
| CopulaGAN           |                                                                            |              |
| batch_size          | Number of data samples to process in each step when learning the algorithm | 500          |
| discriminator_dim   | Size of the output samples for each one of the Discriminator Layers        | ( 256, 256 ) |
| discriminator_decay | Discriminator weight decay for the Adam Optimizer                          | 1e-6.        |
| discriminator_lr    | Learning rate (Discriminator)                                              | 2.00E-04     |
| discriminator_steps | Number of discriminator updates to do for each generator update            | 1            |
| embedding_dim       | Size of the random sample passed to the Generator                          | 128          |
| generator_decay     | Weight decay for the Adam Optimizer in the discriminator                   | 1.00E-06     |
| generator_dim       | Size of the output samples for each one of the Residuals                   | ( 256, 256 ) |
| generator_lr        | Learning rate (Generator)                                                  | 2.00E-04     |
| log_frequency       | Whether to use log frequency of categorical levels in conditional sampling | TRUE         |
| pac                 | Number of samples to group together when applying the discriminator        | 10           |
| TVAE                |                                                                            |              |
| batch_size          | Number of data samples to process in each step                             | 500          |

|                 |                                                                     |              |
|-----------------|---------------------------------------------------------------------|--------------|
| compress_dims   | Size of each hidden layer(Encoder)                                  | ( 128, 128 ) |
| decompress_dims | Size of each hidden layer(Decoder)                                  | ( 128, 128 ) |
| embedding_dim   | Size of the random sample passed to the Generator                   | 128          |
| l2scale         | L2 Regularization                                                   | 1.00E-05     |
| loss_factor     | Multiplier for the reconstruction error                             | 2            |
| pac             | Number of samples to group together when applying the discriminator | 10           |

Table S2: Results of optimizing parameters.

| number | value    | params_colsample_bytree | params_gamma    | params_learning_rate | params_max_depth | params_min_child_weight | params_n_estimators | params_reg_alpha | params_reg_lambda | params_subsample |
|--------|----------|-------------------------|-----------------|----------------------|------------------|-------------------------|---------------------|------------------|-------------------|------------------|
| 0      | 0.800379 | 0.163051                | 8.89E-05        | 0.034841             | 1                | 4                       | 147                 | 5.89E-04         | 1.06E-03          | 0.222573         |
| 1      | 0.808356 | 0.028717                | 6.11E-06        | 0.079513             | 7                | 7                       | 185                 | 6.50E-04         | 2.07E-06          | 0.121946         |
| 2      | 1        | 0.275222                | 1.53E-08        | 0.015174             | 4                | 4                       | 494                 | 1.88E-03         | 7.37E-06          | 0.021813         |
| 3      | 0.800822 | 0.022496                | 4.57E-01        | 0.028486             | 6                | 10                      | 457                 | 9.00E-04         | 4.39E-03          | 0.236669         |
| 4      | 0.657322 | 0.030317                | 3.83E-05        | 0.028636             | 1                | 5                       | 253                 | 1.80E-06         | 7.28E-06          | 0.085671         |
| 5      | 0.808356 | 0.020041                | 1.41E-03        | 0.011766             | 7                | 9                       | 429                 | 2.12E-02         | 2.17E-07          | 0.166615         |
| 6      | 0.820148 | 0.018519                | 5.71E-07        | 0.052446             | 6                | 7                       | 141                 | 6.06E-06         | 3.33E-01          | 0.678972         |
| 7      | 0.980094 | 0.060789                | 1.09E-06        | 0.06629              | 5                | 3                       | 244                 | 1.53E-06         | 3.01E-05          | 0.018694         |
| 8      | 0.800379 | 0.18814                 | 8.81E-07        | 0.030862             | 1                | 3                       | 500                 | 2.00E-06         | 2.52E-03          | 0.019702         |
| 9      | 0.812062 | 0.051189                | 5.79E-07        | 0.031905             | 4                | 2                       | 446                 | 1.86E-03         | 6.86E-08          | 0.034809         |
| 10     | 1        | 0.709559                | 2.61E-08        | 0.321826             | 9                | 1                       | 359                 | 9.06E-01         | 1.30E-08          | 0.038576         |
| 11     | 1        | <b>0.760085</b>         | <b>1.23E-08</b> | <b>0.443292</b>      | <b>9</b>         | <b>1</b>                | <b>365</b>          | <b>5.02E-01</b>  | <b>1.52E-08</b>   | <b>0.045568</b>  |
| 12     | 1        | 0.747126                | 2.82E-08        | 0.284557             | 3                | 1                       | 336                 | 2.47E-08         | 5.21E-07          | 0.013061         |
| 13     | 1        | 0.403796                | 1.22E-08        | 0.180683             | 9                | 6                       | 353                 | 8.06E-01         | 1.17E-08          | 0.048082         |
| 14     | 1        | 0.34135                 | 2.75E-03        | 0.787026             | 3                | 4                       | 53                  | 5.22E-02         | 5.17E-05          | 0.027822         |
| 15     | 1        | 0.375008                | 1.92E-07        | 0.164227             | 8                | 2                       | 404                 | 3.01E-02         | 1.25E-01          | 0.01001          |
| 16     | 0.950131 | 0.191417                | 1.14E-07        | 0.011949             | 3                | 5                       | 303                 | 2.77E-05         | 2.41E-06          | 0.068489         |
| 17     | 1        | 0.304049                | 8.20E-03        | 0.873977             | 3                | 4                       | 60                  | 1.05E-02         | 1.46E-04          | 0.022799         |
| 18     | 0.959253 | 0.090854                | 8.65E-02        | 0.934162             | 4                | 7                       | 51                  | 5.72E-03         | 8.84E-04          | 0.020236         |
| 19     | 1        | 0.443988                | 1.20E-05        | 0.160144             | 8                | 3                       | 406                 | 4.74E-05         | 4.80E-01          | 0.011868         |
| 20     | 0.930723 | 0.513585                | 1.68E-03        | 0.143373             | 2                | 3                       | 202                 | 6.71E-05         | 2.56E-02          | 0.011249         |
| 21     | 1        | 0.993451                | 3.47E-02        | 0.488853             | 4                | 4                       | 483                 | 1.34E-01         | 4.52E-04          | 0.031156         |
| 22     | 1        | 0.54487                 | 3.87E-04        | 0.359486             | 8                | 2                       | 395                 | 9.02E-08         | 1.51E-02          | 0.014927         |
| 23     | 0.808356 | 0.010232                | 6.50E-06        | 0.594751             | 8                | 1                       | 307                 | 2.40E-01         | 1.82E-04          | 0.057831         |
| 24     | 1        | 0.281485                | 7.12E-08        | 0.210272             | 9                | 6                       | 338                 | 7.46E-01         | 1.20E-08          | 0.054193         |
| 25     | 1        | 0.82146                 | 3.98E-04        | 0.307003             | 5                | 1                       | 402                 | 1.84E-08         | 1.97E-02          | 0.014056         |
| 26     | 1        | 0.858941                | 3.70E-02        | 0.399896             | 5                | 2                       | 465                 | 7.53E-08         | 1.25E-02          | 0.016735         |
| 27     | 0.952818 | 0.136467                | 9.07E-08        | 0.209305             | 9                | 6                       | 348                 | 2.84E-07         | 1.40E-07          | 0.115757         |
| 28     | 1        | 0.288583                | 2.69E-04        | 0.10568              | 6                | 8                       | 423                 | 1.80E-04         | 6.43E-02          | 0.653358         |
| 29     | 1        | 0.863902                | 8.59E-03        | 0.639041             | 5                | 2                       | 106                 | 2.05E-08         | 6.85E-03          | 0.028713         |

Adopted parameters are highlighted in yellow, bold italic.

Table S3: Basic statistics

| EEG signals   |       |      | Empathetic dispositions |      |      |
|---------------|-------|------|-------------------------|------|------|
| EEG electrode | Mean  | SD   | Questionnaires          | Mean | SD   |
| AF3           | 0.23  | 9.13 | Q1                      | 3.91 | 1.70 |
| F7            | 0.48  | 7.49 | Q2                      | 4.00 | 1.61 |
| F3            | 0.23  | 8.00 | Q3                      | 5.00 | 0.89 |
| FC5           | 0.41  | 6.94 | Q4                      | 4.45 | 0.69 |
| T7            | 0.04  | 3.76 | Q5                      | 4.27 | 1.10 |
| P7            | -0.25 | 8.04 | Q6                      | 4.45 | 1.04 |
| O1            | 0.41  | 6.84 | Q7                      | 4.91 | 0.83 |
| O2            | -0.05 | 6.55 | Q8                      | 4.82 | 0.87 |
| P8            | 0.32  | 4.91 | Q9                      | 4.55 | 0.69 |
| T8            | 0.07  | 5.98 | Q10                     | 5.00 | 0.77 |

|     |      |       |     |      |      |
|-----|------|-------|-----|------|------|
| FC6 | 0.25 | 8.04  | Q11 | 3.45 | 1.51 |
| F4  | 0.29 | 9.15  | Q12 | 3.00 | 1.10 |
| F8  | 0.16 | 9.09  | Q13 | 3.09 | 0.94 |
| AF4 | 0.48 | 11.91 | Q14 | 3.73 | 1.10 |
| --- | ---  | ---   | Q15 | 3.64 | 0.81 |
| --- | ---  | ---   | Q16 | 3.64 | 1.12 |
| --- | ---  | ---   | Q17 | 3.00 | 0.89 |
| --- | ---  | ---   | Q18 | 3.36 | 1.29 |
| --- | ---  | ---   | Q19 | 3.00 | 1.10 |
| --- | ---  | ---   | Q20 | 2.82 | 1.54 |

Table S4: Data qualities in each deep generative model.

| CTGAN |                                                  |                   |        |             |        |        |        |        |        |        |
|-------|--------------------------------------------------|-------------------|--------|-------------|--------|--------|--------|--------|--------|--------|
| MSE   | Epoch                                            |                   | 5      | 10          | 30     | 50     | 100    | 300    | 500    | 1000   |
|       | Synthesized sample sizes<br>(Augmentation ratio) | 3840<br>(100%)    | 7.5415 | 10.780<br>3 | 2.9204 | 8.5584 | 4.3942 | 3.2276 | 4.5944 | 1.2044 |
|       |                                                  | 7680<br>(200%)    | 7.3848 | 10.688<br>4 | 2.9178 | 8.7066 | 4.4468 | 3.2776 | 4.5034 | 1.1927 |
|       |                                                  | 11520<br>(300%)   | 7.4195 | 10.764<br>6 | 2.8891 | 8.7655 | 4.4580 | 3.2881 | 4.4833 | 1.1759 |
|       |                                                  | 19200<br>(500%)   | 7.4195 | 10.764<br>6 | 2.8891 | 8.7655 | 4.4580 | 3.2881 | 4.4833 | 1.1759 |
|       |                                                  | 38400<br>(1000%)  | 7.4195 | 10.764<br>6 | 2.8891 | 8.7655 | 4.4580 | 3.2881 | 4.4833 | 1.1759 |
|       |                                                  | 115200<br>(3000%) | 7.4195 | 10.764<br>6 | 2.8891 | 8.7655 | 4.4580 | 3.2881 | 4.4833 | 1.1759 |
|       |                                                  | Epoch             |        | 5           | 10     | 30     | 50     | 100    | 300    | 500    |
| CC    | Synthesized sample sizes<br>(Augmentation ratio) | 3840<br>(100%)    | 0.4555 | 0.4433      | 0.6502 | 0.3737 | 0.5732 | 0.7894 | 0.6659 | 0.9600 |
|       |                                                  | 7680<br>(200%)    | 0.4647 | 0.4459      | 0.6510 | 0.3677 | 0.5715 | 0.7862 | 0.6679 | 0.9601 |
|       |                                                  | 11520<br>(300%)   | 0.4626 | 0.4444      | 0.6539 | 0.3649 | 0.5695 | 0.7871 | 0.6688 | 0.9610 |
|       |                                                  | 19200<br>(500%)   | 0.4626 | 0.4444      | 0.6539 | 0.3649 | 0.5695 | 0.7871 | 0.6688 | 0.9610 |
|       |                                                  |                   |        |             |        |        |        |        |        |        |

|           |                                                  |                               |        |        |        |        |        |        |        |        |
|-----------|--------------------------------------------------|-------------------------------|--------|--------|--------|--------|--------|--------|--------|--------|
|           |                                                  | <div>38400<br/>(1000%)</div>  | 0.4626 | 0.4444 | 0.6539 | 0.3649 | 0.5695 | 0.7871 | 0.6688 | 0.9610 |
|           |                                                  | <div>115200<br/>(3000%)</div> | 0.4626 | 0.4444 | 0.6539 | 0.3649 | 0.5695 | 0.7871 | 0.6688 | 0.9610 |
| SMV       | Epoch                                            |                               | 5      | 10     | 30     | 50     | 100    | 300    | 500    | 1000   |
|           | Synthesized sample sizes<br>(Augmentation ratio) | <div>3840<br/>(100%)</div>    | 0.1001 | 0.0984 | 0.1000 | 0.0992 | 0.0812 | 0.0608 | 0.0426 | 0.0150 |
|           |                                                  | <div>7680<br/>(200%)</div>    | 0.0998 | 0.0988 | 0.1000 | 0.0992 | 0.0817 | 0.0610 | 0.0423 | 0.0148 |
|           |                                                  | <div>11520<br/>(300%)</div>   | 0.0999 | 0.0990 | 0.1002 | 0.0993 | 0.0818 | 0.0612 | 0.0422 | 0.0151 |
|           |                                                  | <div>19200<br/>(500%)</div>   | 0.0999 | 0.0990 | 0.1002 | 0.0993 | 0.0818 | 0.0612 | 0.0422 | 0.0151 |
|           |                                                  | <div>38400<br/>(1000%)</div>  | 0.0999 | 0.0990 | 0.1002 | 0.0993 | 0.0818 | 0.0612 | 0.0422 | 0.0151 |
|           |                                                  | <div>115200<br/>(3000%)</div> | 0.0999 | 0.0990 | 0.1002 | 0.0993 | 0.0818 | 0.0612 | 0.0422 | 0.0151 |
|           |                                                  |                               |        |        |        |        |        |        |        |        |
| CopulaGAN |                                                  |                               |        |        |        |        |        |        |        |        |
| MSE       | Epoch                                            |                               | 5      | 10     | 30     | 50     | 100    | 300    | 500    | 1000   |
|           | Synthesized sample sizes<br>(Augmentation ratio) | <div>3840<br/>(100%)</div>    | 7.656  | 6.062  | 2.543  | 3.052  | 4.730  | 3.323  | 3.762  | 0.600  |
|           |                                                  | <div>7680<br/>(200%)</div>    | 7.656  | 6.062  | 2.543  | 3.052  | 4.730  | 3.323  | 3.762  | 0.600  |
|           |                                                  | <div>11520<br/>(300%)</div>   | 7.656  | 6.062  | 2.543  | 3.052  | 4.730  | 3.323  | 3.762  | 0.600  |
|           |                                                  | <div>19200<br/>(500%)</div>   | 7.656  | 6.062  | 2.543  | 3.052  | 4.730  | 3.323  | 3.762  | 0.600  |
|           |                                                  | <div>38400<br/>(1000%)</div>  | 7.656  | 6.062  | 2.543  | 3.052  | 4.730  | 3.323  | 3.762  | 0.600  |
|           |                                                  | <div>115200<br/>(3000%)</div> | 7.656  | 6.062  | 2.543  | 3.052  | 4.730  | 3.323  | 3.762  | 0.600  |
|           |                                                  |                               |        |        |        |        |        |        |        |        |
| CC        | Epoch                                            |                               | 5      | 10     | 30     | 50     | 100    | 300    | 500    | 1000   |
|           | Synthesized sample sizes<br>(Augmentation ratio) | <div>3840<br/>(100%)</div>    | 0.6520 | 0.6951 | 0.8399 | 0.6915 | 0.5884 | 0.6979 | 0.8308 | 0.9326 |
|           |                                                  | <div>7680</div>               | 0.6520 | 0.6951 | 0.8399 | 0.6915 | 0.5884 | 0.6979 | 0.8308 | 0.9326 |



|     |                                                  |                   |        |        |        |        |        |        |        |        |
|-----|--------------------------------------------------|-------------------|--------|--------|--------|--------|--------|--------|--------|--------|
|     |                                                  | (3000%)           |        |        |        |        |        |        |        |        |
| CC  | Epoch                                            |                   | 5      | 10     | 30     | 50     | 100    | 300    | 500    | 1000   |
|     | Synthesized sample sizes<br>(Augmentation ratio) | 3840<br>(100%)    | 0.8883 | 0.8940 | 0.9294 | 0.9631 | 0.9658 | 0.9864 | 0.9880 | 0.9850 |
|     |                                                  | 7680<br>(200%)    | 0.8884 | 0.8933 | 0.9277 | 0.9635 | 0.9653 | 0.9907 | 0.9892 | 0.9870 |
|     |                                                  | 11520<br>(300%)   | 0.8883 | 0.8934 | 0.9276 | 0.9636 | 0.9648 | 0.9911 | 0.9897 | 0.9868 |
|     |                                                  | 19200<br>(500%)   | 0.8883 | 0.8934 | 0.9276 | 0.9636 | 0.9648 | 0.9911 | 0.9897 | 0.9868 |
|     |                                                  | 38400<br>(1000%)  | 0.8883 | 0.8934 | 0.9276 | 0.9636 | 0.9648 | 0.9911 | 0.9897 | 0.9868 |
|     |                                                  | 115200<br>(3000%) | 0.8883 | 0.8934 | 0.9276 | 0.9636 | 0.9648 | 0.9911 | 0.9897 | 0.9868 |
|     | Epoch                                            |                   | 5      | 10     | 30     | 50     | 100    | 300    | 500    | 1000   |
| SMV | Synthesized sample sizes<br>(Augmentation ratio) | 3840<br>(100%)    | ---    | ---    | ---    | 0.0735 | 0.0394 | 0.0051 | 0.0052 | 0.0037 |
|     |                                                  | 7680<br>(200%)    | ---    | ---    | ---    | 0.0733 | 0.0392 | 0.0053 | 0.0050 | 0.0036 |
|     |                                                  | 11520<br>(300%)   | ---    | ---    | ---    | 0.0730 | 0.0393 | 0.0052 | 0.0048 | 0.0035 |
|     |                                                  | 19200<br>(500%)   | ---    | ---    | ---    | 0.0730 | 0.0393 | 0.0052 | 0.0048 | 0.0035 |
|     |                                                  | 38400<br>(1000%)  | ---    | ---    | ---    | 0.0730 | 0.0393 | 0.0052 | 0.0048 | 0.0035 |
|     |                                                  | 115200<br>(3000%) | ---    | ---    | ---    | 0.0730 | 0.0393 | 0.0052 | 0.0048 | 0.0035 |
|     | Epoch                                            |                   | 5      | 10     | 30     | 50     | 100    | 300    | 500    | 1000   |

Abbreviations: MSE; mean squared error, CC; correlation coefficient, SMV; structure matching value

Table S5: Predictive performance in each deep generative model.

| CTGAN    |                                            |                |       |       |       |      |       |      |       |      |
|----------|--------------------------------------------|----------------|-------|-------|-------|------|-------|------|-------|------|
| Accuracy | Epoch                                      |                | 5     | 10    | 30    | 50   | 100   | 300  | 500   | 1000 |
|          | Synthesized sample sizes<br>(Augmentation) | 3840<br>(100%) | 0.501 | 0.478 | 0.477 | 0.62 | 0.892 | 0.82 | 0.961 | 1    |

|           |                                                        |                   |       |       |       |       |       |       |       |      |
|-----------|--------------------------------------------------------|-------------------|-------|-------|-------|-------|-------|-------|-------|------|
|           | ratio)                                                 | 7680<br>(200%)    | 0.579 | 0.555 | 0.568 | 0.582 | 0.949 | 0.868 | 0.96  | 1    |
|           |                                                        | 11520<br>(300%)   | 0.513 | 0.53  | 0.379 | 0.54  | 0.895 | 0.805 | 0.948 | 1    |
|           |                                                        | 19200<br>(500%)   | 0.513 | 0.53  | 0.379 | 0.54  | 0.895 | 0.805 | 0.948 | 1    |
|           |                                                        | 38400<br>(1000%)  | 0.513 | 0.53  | 0.379 | 0.54  | 0.895 | 0.805 | 0.948 | 1    |
|           |                                                        | 115200<br>(3000%) | 0.513 | 0.53  | 0.379 | 0.54  | 0.895 | 0.805 | 0.948 | 1    |
| AUC       | Epoch                                                  |                   | 5     | 10    | 30    | 50    | 100   | 300   | 500   | 1000 |
|           | Synthesized<br>sample sizes<br>(Augmentation<br>ratio) | 3840<br>(100%)    | 0.484 | 0.484 | 0.467 | 0.651 | 0.971 | 0.875 | 0.997 | 1    |
|           |                                                        | 7680<br>(200%)    | 0.608 | 0.575 | 0.582 | 0.639 | 1     | 0.917 | 0.995 | 1    |
|           |                                                        | 11520<br>(300%)   | 0.514 | 0.54  | 0.346 | 0.554 | 0.992 | 0.836 | 0.991 | 1    |
|           |                                                        | 19200<br>(500%)   | 0.514 | 0.54  | 0.346 | 0.554 | 0.992 | 0.836 | 0.991 | 1    |
|           |                                                        | 38400<br>(1000%)  | 0.514 | 0.54  | 0.346 | 0.554 | 0.992 | 0.836 | 0.991 | 1    |
|           |                                                        | 115200<br>(3000%) | 0.514 | 0.54  | 0.346 | 0.554 | 0.992 | 0.836 | 0.991 | 1    |
|           |                                                        |                   |       |       |       |       |       |       |       |      |
| Precision | Epoch                                                  |                   | 5     | 10    | 30    | 50    | 100   | 300   | 500   | 1000 |
|           | Synthesized<br>sample sizes<br>(Augmentation<br>ratio) | 3840<br>(100%)    | 0.501 | 0.476 | 0.479 | 0.602 | 1     | 0.882 | 0.94  | 1    |
|           |                                                        | 7680<br>(200%)    | 0.588 | 0.548 | 0.556 | 0.562 | 1     | 0.973 | 0.956 | 1    |
|           |                                                        | 11520<br>(300%)   | 0.517 | 0.536 | 0.388 | 0.543 | 1     | 0.947 | 0.92  | 1    |
|           |                                                        | 19200<br>(500%)   | 0.517 | 0.536 | 0.388 | 0.543 | 1     | 0.947 | 0.92  | 1    |
|           |                                                        | 38400<br>(1000%)  | 0.517 | 0.536 | 0.388 | 0.543 | 1     | 0.947 | 0.92  | 1    |
|           |                                                        | 115200            | 0.517 | 0.536 | 0.388 | 0.543 | 1     | 0.947 | 0.92  | 1    |

|           |                                               |                |       |       |       |       |       |       |       |       |
|-----------|-----------------------------------------------|----------------|-------|-------|-------|-------|-------|-------|-------|-------|
|           |                                               | (3000%)        |       |       |       |       |       |       |       |       |
| Recall    | Epoch                                         |                | 5     | 10    | 30    | 50    | 100   | 300   | 500   | 1000  |
|           | Synthesized sample sizes (Augmentation ratio) | 3840 (100%)    | 0.591 | 0.432 | 0.531 | 0.706 | 0.784 | 0.74  | 0.984 | 1     |
|           |                                               | 7680 (200%)    | 0.529 | 0.622 | 0.677 | 0.745 | 0.898 | 0.758 | 0.964 | 1     |
|           |                                               | 11520 (300%)   | 0.398 | 0.445 | 0.419 | 0.513 | 0.789 | 0.646 | 0.982 | 1     |
|           |                                               | 19200 (500%)   | 0.398 | 0.445 | 0.419 | 0.513 | 0.789 | 0.646 | 0.982 | 1     |
|           |                                               | 38400 (1000%)  | 0.398 | 0.445 | 0.419 | 0.513 | 0.789 | 0.646 | 0.982 | 1     |
|           |                                               | 115200 (3000%) | 0.398 | 0.445 | 0.419 | 0.513 | 0.789 | 0.646 | 0.982 | 1     |
|           |                                               |                |       |       |       |       |       |       |       |       |
| F1        | Epoch                                         |                | 5     | 10    | 30    | 50    | 100   | 300   | 500   | 1000  |
|           | Synthesized sample sizes (Augmentation ratio) | 3840 (100%)    | 0.542 | 0.453 | 0.504 | 0.65  | 0.879 | 0.805 | 0.962 | 1     |
|           |                                               | 7680 (200%)    | 0.557 | 0.583 | 0.61  | 0.641 | 0.947 | 0.852 | 0.96  | 1     |
|           |                                               | 11520 (300%)   | 0.45  | 0.486 | 0.403 | 0.527 | 0.882 | 0.768 | 0.95  | 1     |
|           |                                               | 19200 (500%)   | 0.45  | 0.486 | 0.403 | 0.527 | 0.882 | 0.768 | 0.95  | 1     |
|           |                                               | 38400 (1000%)  | 0.45  | 0.486 | 0.403 | 0.527 | 0.882 | 0.768 | 0.95  | 1     |
|           |                                               | 115200 (3000%) | 0.45  | 0.486 | 0.403 | 0.527 | 0.882 | 0.768 | 0.95  | 1     |
|           |                                               |                |       |       |       |       |       |       |       |       |
| CopulaGAN |                                               |                |       |       |       |       |       |       |       |       |
| Accuracy  | Epoch                                         |                | 5     | 10    | 30    | 50    | 100   | 300   | 500   | 1000  |
|           | Synthesized sample sizes (Augmentation ratio) | 3840 (100%)    | 0.526 | 0.487 | 0.4   | 0.422 | 0.762 | 0.88  | 0.974 | 0.999 |
|           |                                               | 7680 (200%)    | 0.526 | 0.487 | 0.4   | 0.422 | 0.762 | 0.88  | 0.974 | 0.999 |
|           |                                               | 11520 (300%)   | 0.526 | 0.487 | 0.4   | 0.422 | 0.762 | 0.88  | 0.974 | 0.999 |



|           |                                                        |                   |       |       |       |       |       |       |       |       |
|-----------|--------------------------------------------------------|-------------------|-------|-------|-------|-------|-------|-------|-------|-------|
|           |                                                        | 19200<br>(500%)   | 0.526 | 0.487 | 0.4   | 0.422 | 0.762 | 0.88  | 0.974 | 0.999 |
|           |                                                        | 38400<br>(1000%)  | 0.526 | 0.487 | 0.4   | 0.422 | 0.762 | 0.88  | 0.974 | 0.999 |
|           |                                                        | 115200<br>(3000%) | 0.526 | 0.487 | 0.4   | 0.422 | 0.762 | 0.88  | 0.974 | 0.999 |
| AUC       | Epoch                                                  |                   | 5     | 10    | 30    | 50    | 100   | 300   | 500   | 1000  |
|           | Synthesized<br>sample sizes<br>(Augmentation<br>ratio) | 3840<br>(100%)    | 0.524 | 0.465 | 0.369 | 0.385 | 0.833 | 0.947 | 0.998 | 1     |
|           |                                                        | 7680<br>(200%)    | 0.524 | 0.465 | 0.369 | 0.385 | 0.833 | 0.947 | 0.998 | 1     |
|           |                                                        | 11520<br>(300%)   | 0.524 | 0.465 | 0.369 | 0.385 | 0.833 | 0.947 | 0.998 | 1     |
|           |                                                        | 19200<br>(500%)   | 0.524 | 0.465 | 0.369 | 0.385 | 0.833 | 0.947 | 0.998 | 1     |
|           |                                                        | 38400<br>(1000%)  | 0.524 | 0.465 | 0.369 | 0.385 | 0.833 | 0.947 | 0.998 | 1     |
|           |                                                        | 115200<br>(3000%) | 0.524 | 0.465 | 0.369 | 0.385 | 0.833 | 0.947 | 0.998 | 1     |
|           |                                                        |                   |       |       |       |       |       |       |       |       |
| Precision | Epoch                                                  |                   | 5     | 10    | 30    | 50    | 100   | 300   | 500   | 1000  |
|           | Synthesized<br>sample sizes<br>(Augmentation<br>ratio) | 3840<br>(100%)    | 0.52  | 0.489 | 0.42  | 0.414 | 0.802 | 0.865 | 0.992 | 1     |
|           |                                                        | 7680<br>(200%)    | 0.52  | 0.489 | 0.42  | 0.414 | 0.802 | 0.865 | 0.992 | 1     |
|           |                                                        | 11520<br>(300%)   | 0.52  | 0.489 | 0.42  | 0.414 | 0.802 | 0.865 | 0.992 | 1     |
|           |                                                        | 19200<br>(500%)   | 0.52  | 0.489 | 0.42  | 0.414 | 0.802 | 0.865 | 0.992 | 1     |
|           |                                                        | 38400<br>(1000%)  | 0.52  | 0.489 | 0.42  | 0.414 | 0.802 | 0.865 | 0.992 | 1     |
|           |                                                        | 115200<br>(3000%) | 0.52  | 0.489 | 0.42  | 0.414 | 0.802 | 0.865 | 0.992 | 1     |
|           |                                                        |                   |       |       |       |       |       |       |       |       |
|           |                                                        |                   |       |       |       |       |       |       |       |       |
| Recall    | Epoch                                                  |                   | 5     | 10    | 30    | 50    | 100   | 300   | 500   | 1000  |
|           | Synthesized<br>sample sizes                            | 3840<br>(100%)    | 0.661 | 0.568 | 0.523 | 0.378 | 0.695 | 0.901 | 0.956 | 0.997 |

|          |                                                  |                   |       |       |       |       |       |       |       |       |
|----------|--------------------------------------------------|-------------------|-------|-------|-------|-------|-------|-------|-------|-------|
|          | (Augmentation ratio)                             | 7680<br>(200%)    | 0.661 | 0.568 | 0.523 | 0.378 | 0.695 | 0.901 | 0.956 | 0.997 |
|          |                                                  | 11520<br>(300%)   | 0.661 | 0.568 | 0.523 | 0.378 | 0.695 | 0.901 | 0.956 | 0.997 |
|          |                                                  | 19200<br>(500%)   | 0.661 | 0.568 | 0.523 | 0.378 | 0.695 | 0.901 | 0.956 | 0.997 |
|          |                                                  | 38400<br>(1000%)  | 0.661 | 0.568 | 0.523 | 0.378 | 0.695 | 0.901 | 0.956 | 0.997 |
|          |                                                  | 115200<br>(3000%) | 0.661 | 0.568 | 0.523 | 0.378 | 0.695 | 0.901 | 0.956 | 0.997 |
| F1       | Epoch                                            |                   | 5     | 10    | 30    | 50    | 100   | 300   | 500   | 1000  |
|          | Synthesized sample sizes<br>(Augmentation ratio) | 3840<br>(100%)    | 0.583 | 0.525 | 0.466 | 0.395 | 0.745 | 0.883 | 0.973 | 0.999 |
|          |                                                  | 7680<br>(200%)    | 0.583 | 0.525 | 0.466 | 0.395 | 0.745 | 0.883 | 0.973 | 0.999 |
|          |                                                  | 11520<br>(300%)   | 0.583 | 0.525 | 0.466 | 0.395 | 0.745 | 0.883 | 0.973 | 0.999 |
|          |                                                  | 19200<br>(500%)   | 0.583 | 0.525 | 0.466 | 0.395 | 0.745 | 0.883 | 0.973 | 0.999 |
|          |                                                  | 38400<br>(1000%)  | 0.583 | 0.525 | 0.466 | 0.395 | 0.745 | 0.883 | 0.973 | 0.999 |
|          |                                                  | 115200<br>(3000%) | 0.583 | 0.525 | 0.466 | 0.395 | 0.745 | 0.883 | 0.973 | 0.999 |
|          |                                                  |                   |       |       |       |       |       |       |       |       |
| TVAE     |                                                  |                   |       |       |       |       |       |       |       |       |
| Accuracy | Epoch                                            |                   | 5     | 10    | 30    | 50    | 100   | 300   | 500   | 1000  |
|          | Synthesized sample sizes<br>(Augmentation ratio) | 3840<br>(100%)    | 0.505 | 0.538 | 0.622 | 0.665 | 0.993 | 0.997 | 0.984 | 1     |
|          |                                                  | 7680<br>(200%)    | 0.566 | 0.526 | 0.618 | 0.617 | 0.965 | 0.987 | 0.986 | 1     |
|          |                                                  | 11520<br>(300%)   | 0.457 | 0.487 | 0.646 | 0.604 | 0.961 | 0.987 | 0.993 | 0.997 |
|          |                                                  | 19200<br>(500%)   | 0.457 | 0.487 | 0.646 | 0.604 | 0.961 | 0.987 | 0.993 | 0.997 |
|          |                                                  | 38400<br>(1000%)  | 0.457 | 0.487 | 0.646 | 0.604 | 0.961 | 0.987 | 0.993 | 0.997 |
|          |                                                  |                   |       |       |       |       |       |       |       |       |

|           |                                                        |                   |       |       |       |       |       |       |       |       |
|-----------|--------------------------------------------------------|-------------------|-------|-------|-------|-------|-------|-------|-------|-------|
|           |                                                        | 115200<br>(3000%) | 0.457 | 0.487 | 0.646 | 0.604 | 0.961 | 0.987 | 0.993 | 0.997 |
| AUC       | Epoch                                                  |                   | 5     | 10    | 30    | 50    | 100   | 300   | 500   | 1000  |
|           | Synthesized<br>sample sizes<br>(Augmentation<br>ratio) | 3840<br>(100%)    | 0.507 | 0.548 | 0.658 | 0.746 | 1     | 1     | 0.999 | 1     |
|           |                                                        | 7680<br>(200%)    | 0.579 | 0.511 | 0.651 | 0.667 | 0.999 | 1     | 0.999 | 1     |
|           |                                                        | 11520<br>(300%)   | 0.449 | 0.48  | 0.69  | 0.65  | 0.994 | 0.999 | 1     | 1     |
|           |                                                        | 19200<br>(500%)   | 0.449 | 0.48  | 0.69  | 0.65  | 0.994 | 0.999 | 1     | 1     |
|           |                                                        | 38400<br>(1000%)  | 0.449 | 0.48  | 0.69  | 0.65  | 0.994 | 0.999 | 1     | 1     |
|           |                                                        | 115200<br>(3000%) | 0.449 | 0.48  | 0.69  | 0.65  | 0.994 | 0.999 | 1     | 1     |
|           |                                                        |                   |       |       |       |       |       |       |       |       |
| Precision | Epoch                                                  |                   | 5     | 10    | 30    | 50    | 100   | 300   | 500   | 1000  |
|           | Synthesized<br>sample sizes<br>(Augmentation<br>ratio) | 3840<br>(100%)    | 0.506 | 0.533 | 0.626 | 0.674 | 0.995 | 0.997 | 0.982 | 1     |
|           |                                                        | 7680<br>(200%)    | 0.557 | 0.522 | 0.625 | 0.624 | 0.936 | 0.977 | 0.975 | 1     |
|           |                                                        | 11520<br>(300%)   | 0.468 | 0.488 | 0.63  | 0.601 | 0.973 | 0.987 | 0.992 | 1     |
|           |                                                        | 19200<br>(500%)   | 0.468 | 0.488 | 0.63  | 0.601 | 0.973 | 0.987 | 0.992 | 1     |
|           |                                                        | 38400<br>(1000%)  | 0.468 | 0.488 | 0.63  | 0.601 | 0.973 | 0.987 | 0.992 | 1     |
|           |                                                        | 115200<br>(3000%) | 0.468 | 0.488 | 0.63  | 0.601 | 0.973 | 0.987 | 0.992 | 1     |
|           |                                                        |                   |       |       |       |       |       |       |       |       |
|           |                                                        |                   |       |       |       |       |       |       |       |       |
| Recall    | Epoch                                                  |                   | 5     | 10    | 30    | 50    | 100   | 300   | 500   | 1000  |
|           | Synthesized<br>sample sizes<br>(Augmentation<br>ratio) | 3840<br>(100%)    | 0.466 | 0.602 | 0.609 | 0.641 | 0.992 | 0.997 | 0.987 | 1     |
|           |                                                        | 7680<br>(200%)    | 0.654 | 0.615 | 0.591 | 0.589 | 0.997 | 0.977 | 0.997 | 1     |
|           |                                                        | 11520<br>(300%)   | 0.633 | 0.536 | 0.706 | 0.622 | 0.948 | 0.987 | 0.995 | 0.995 |

|    |                                                        |                   |       |       |       |       |       |       |       |       |
|----|--------------------------------------------------------|-------------------|-------|-------|-------|-------|-------|-------|-------|-------|
|    |                                                        | 19200<br>(500%)   | 0.633 | 0.536 | 0.706 | 0.622 | 0.948 | 0.987 | 0.995 | 0.995 |
|    |                                                        | 38400<br>(1000%)  | 0.633 | 0.536 | 0.706 | 0.622 | 0.948 | 0.987 | 0.995 | 0.995 |
|    |                                                        | 115200<br>(3000%) | 0.633 | 0.536 | 0.706 | 0.622 | 0.948 | 0.987 | 0.995 | 0.995 |
| F1 | Epoch                                                  |                   | 5     | 10    | 30    | 50    | 100   | 300   | 500   | 1000  |
|    | Synthesized<br>sample sizes<br>(Augmentation<br>ratio) | 3840<br>(100%)    | 0.485 | 0.565 | 0.617 | 0.657 | 0.993 | 0.997 | 0.984 | 1     |
|    |                                                        | 7680<br>(200%)    | 0.601 | 0.565 | 0.608 | 0.606 | 0.966 | 0.987 | 0.986 | 1     |
|    |                                                        | 11520<br>(300%)   | 0.538 | 0.511 | 0.666 | 0.611 | 0.96  | 0.987 | 0.993 | 0.997 |
|    |                                                        | 19200<br>(500%)   | 0.538 | 0.511 | 0.666 | 0.611 | 0.96  | 0.987 | 0.993 | 0.997 |
|    |                                                        | 38400<br>(1000%)  | 0.538 | 0.511 | 0.666 | 0.611 | 0.96  | 0.987 | 0.993 | 0.997 |
|    |                                                        | 115200<br>(3000%) | 0.538 | 0.511 | 0.666 | 0.611 | 0.96  | 0.987 | 0.993 | 0.997 |

Table S6: Computation time.

| Epoch     | 5     | 10    | 30    | 50    | 100   | 300  | 500  | 1000 |
|-----------|-------|-------|-------|-------|-------|------|------|------|
| CTGAN     | 13.9s | 15.3s | 31.1s | 47s   | 85s   | 225s | 354s | 869s |
| CopulaGAN | 14.6s | 16.3s | 30.3s | 38.8s | 85s   | 219s | 417s | 860s |
| TVAE      | 13.6s | 12.4s | 18.6s | 23.2s | 39.1s | 85s  | 132s | 258s |

### Code S1(A): CTGAN

#### # Importing related modules

```
import numpy as np
```

```
import pandas as pd
```

```
from ctgan import CTGAN
```

#### #Prepare CTGAN algorithm

```
ctgan = CTGAN(epochs=30)
```

#### #Learn CTGAN algorithm

```
ctgan.fit(data, discrete_columns)
```

**#Generate synthesized data by learned algorithm**

**#num\_ samples is the number of synthesized data**

```
synthetic_data = ctgan.sample(n_samples)
```

## Code S1(B): CopulaGAN

**# Importing related modules**

```
import numpy as np
```

```
import pandas as pd
```

```
from sdv.single_table import CopulaGANSynthesizer
```

```
from sdv.metadata.single_table import SingleTableMetadata
```

**#Setting metadata**

```
metadata = SingleTableMetadata()
```

```
metadata.detect_from_dataframe(data)
```

**#Prepare CopulaGAN algorithm**

```
synthesizer = CopulaGANSynthesizer(metadata, epochs=n)
```

**#Learn CopulaGAN algorithm**

```
synthesizer.fit(data)
```

**#Generate synthesized data by learned algorithm**

**#num\_row is the number of synthesized data**

```
synthetic_data = synthesizer.sample(num_rows=num_rows)
```

## Code S1(C): TVAE

**# Importing related modules**

```
import numpy as np
```

```
import pandas as pd
```

```
from sdv.tabular import TVAE
```

**#Prepare TVAE algorithm**

```
tvae = TVAE(epochs=n)
```

### **#Learn TVAE algorithm**

```
tvae.fit(data)
```

### **#Generate synthesized data by learned algorithm**

#### **#num\_row is the number of synthesized data**

```
synthetic_data = tvae.sample(num_rows)
```

## Code S1(D): XGBoost(Hyperparameter tuning)

### **# Importing related modules**

```
import optuna
```

```
import xgboost as xgb
```

### **# Build XGBoost instance**

```
X_data, y_data = preprocessing(data, category_dict)
```

```
xgtrain = xgb.DMatrix(X_data, y_data)
```

```
def objective(trial):
```

#### **# Candidates for hyperparameters tuning**

```
    params = {
```

```
        'max_depth': trial.suggest_int('max_depth', 1, 9),
```

```
        'learning_rate': trial.suggest_loguniform('learning_rate', 0.01, 1.0),
```

```
        'n_estimators': trial.suggest_int('n_estimators', 50, 500),
```

```
        'min_child_weight': trial.suggest_int('min_child_weight', 1, 10),
```

```
        'gamma': trial.suggest_loguniform('gamma', 1e-8, 1.0),
```

```
        'subsample': trial.suggest_loguniform('subsample', 0.01, 1.0),
```

```
        'colsample_bytree': trial.suggest_loguniform('colsample_bytree', 0.01, 1.0),
```

```
        'reg_alpha': trial.suggest_loguniform('reg_alpha', 1e-8, 1.0),
```

```
        'reg_lambda': trial.suggest_loguniform('reg_lambda', 1e-8, 1.0),
```

```
        'eval_metric': 'auc'
```

```
    }
```

#### **# Cross-validation**

```
    cv_results = xgb.cv(
```

```
        params,
```

```
        xgtrain,
```

```
        num_boost_round=100,
```

```
        seed=0,
```

```

        nfold=5, # The number of cross-validation
        metrics={"auc"},
        early_stopping_rounds=5
    )

    return cv_results["test-auc-mean"].min()

```

```

study = optuna.create_study(direction="maximize")
study.optimize(objective, n_trials=30, timeout=300)

```

## Code S2(A): XGBoost(Validation:Setting the trained model)

### # Importing related modules

```

from xgboost import XGBClassifier
from sklearn.model_selection import GridSearchCV
from sklearn.metrics import roc_auc_score
from sklearn.metrics import roc_curve
from sklearn.metrics import accuracy_score
from sklearn.metrics import precision_score
from sklearn.metrics import recall_score
from sklearn.metrics import f1_score
from sklearn.metrics import confusion_matrix

```

### # Prediction

```

def learn_predict(X, y, X_test, y_test):
    xgb=XGBClassifier(learning_rate=0.243258,max_depth=6,min_child_weight=1,gamma=0,colsample_bytree=0.76,n_estimators=365,reg_alpha=0.50,reg_lambda=0,subsample=0.045)

```

```

    xgb.fit(X, y)

```

```

    predictions = xgb.predict_proba(X_test)

```

### # Calculate and print the evaluation metrics

```

    auc = roc_auc_score(y_test, predictions[:, 1])
    bool_prediction = (predictions[:, 1] >= 0.5).astype(int)
    acc = accuracy_score(y_test, bool_prediction)
    precision = precision_score(y_test, bool_prediction)

```

```

recall = recall_score(y_test, bool_pediction)
f1 = f1_score(y_test, bool_pediction)
print("AUC: {:.3f}".format(auc))
print("Accuracy {:.3f}".format(acc))
print("Precision: {:.3f}".format(precision))
print("Recall: {:.3f}".format(recall))
print("f1: {:.3f}".format(f1))
print("Confusion matrix:")
print(confusion_matrix(y_test, bool_pediction))
return (auc, acc, precision, recall, f1)

```

## Code S2(B): XGBoost(Validation:Predicted results)

```

n_samples = [3840,7680,11520,19200,38400,115200] # Generated data
auc_list0 = []
acc_list0 = []
precision_list0 = []
recall_list0 = []
f1_list0 = []

for n in n_samples:
    print("==" * 12)
    print(" # of samples: ", n)
    print("==" * 12)
    ac = learn_predict(X0_syn[:n], y0_syn[:n], X_test, y_test)
    print()
    auc_list0.append(ac[0])
    acc_list0.append(ac[1])
    precision_list0.append(ac[2])
    recall_list0.append(ac[3])
    f1_list0.append(ac[4])
    print("--" * 12)
    print(" # of samples: ", n)
    print("--" * 12)
    st = np.mean(synthetic_data[:n],axis=0)
    print(st)

```



```
print("//" * 12)
print(" # of samples: ", n)
print("//" * 12)
res=synthetic_data[:n].corr()
pd.set_option('display.max_columns', 100)
print(res)
```
